# Supplementary material for: Overexpression of CHKA contributes to tumor progression and metastasis and predicts poor prognosis in colorectal carcinoma
Source: PubMed Central journal article supplement (PMC5341828; doi:10.18632/oncotarget.11433), 2016-08-20
Supplement: oncotarget-07-66660-s001.pdf [file oncotarget-07-66660-s001.pdf]

# Overexpression of CHKA contributes to tumor progression and metastasis and predicts poor prognosis in colorectal carcinoma

## Supplementary Materials

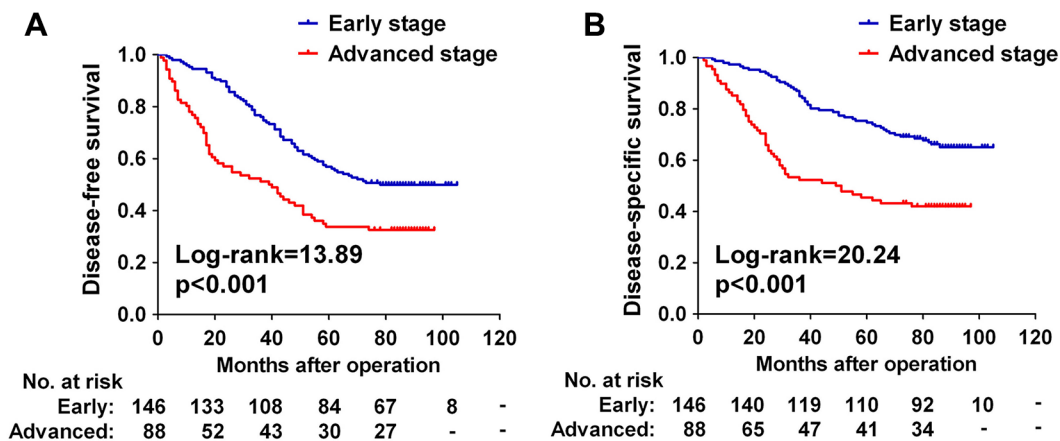

Supplementary Figure S1: Kaplan-Meier curves for disease-free survival (A) and disease-specific survival (B) of CRC patients in the study cohort according to TNM stage of the disease. The *p*-value was determined using the log-rank test. The absolute number of patients at risk in each subgroup was listed below.

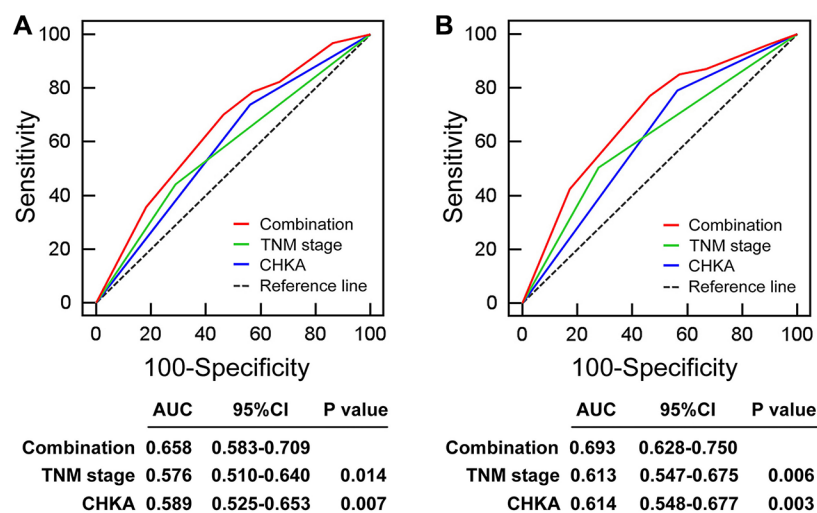

Supplementary Figure S2: Comparisons of the prognostic validity of the combination of CHKA expression and TNM stage model, the TNM stage alone model, and the CHKA expression alone model. Receiver operating characteristics (ROC) curves for the prediction of disease-free survival (A) and disease-specific survival (B). *P* values showed the area under the curve (AUC) of the combination model versus AUCs of the TNM stage alone model or the CHKA expression alone model.

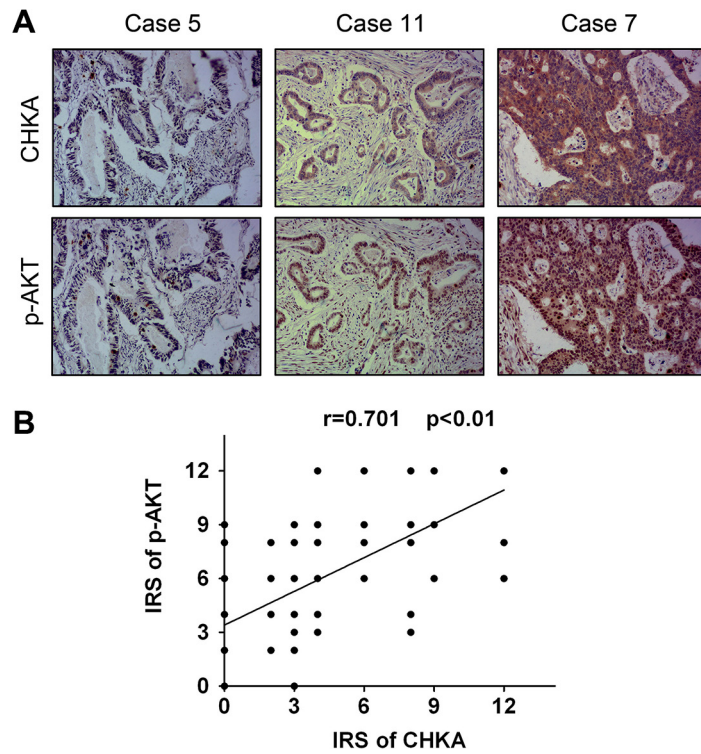

**Supplementary Figure S3:** (A) Representative immunohistochemical staining of CHKA and phospho-AKT in clinical CRC specimens. (B) Correlation between CHKA expression and phospho-AKT level was analyzed among 234 CRC samples using Pearson's correlation test.

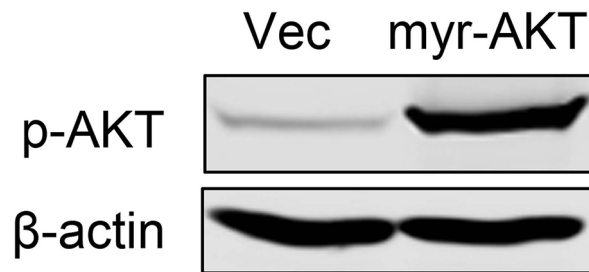

**Supplementary Figure S4:** HCT116 cells were transiently transfected with control vector or myr-AKT plasmid. Twenty four hours post transfection, cell lysates were harvested and subjected to Western blot assay and probed with the indicated antibodies.

**Supplementary Table S1: The spearman rank correlation analysis of CHKA expression with clinicopathologic characteristics of CRC patients**

| Characteristics       | CHKA expression              |                             |
|-----------------------|------------------------------|-----------------------------|
|                       | Correlation coefficient (rs) | <i>P</i> value <sup>a</sup> |
| Gender                | 0.059                        | 0.371                       |
| Age (years)           | -0.079                       | 0.230                       |
| Tumor location        | -0.093                       | 0.156                       |
| Differentiation grade | 0.104                        | 0.113                       |
| Tumor size (cm)       | -0.007                       | 0.911                       |
| Local invasion        | 0.148                        | <b>0.024</b>                |
| Lymph node metastasis | 0.144                        | <b>0.028</b>                |
| TNM stage             | 0.187                        | <b>0.004</b>                |
| Adjuvant chemotherapy | 0.106                        | 0.105                       |
| Recurrence            | 0.186                        | <b>0.004</b>                |
| Death                 | 0.239                        | <b>&lt; 0.001</b>           |

<sup>a</sup>The Spearman correlation test was used for statistical analyses. Bold type indicates statistical significance.

**Supplementary Table S2: Distribution of DFS and DSS times**

| Variable                    | Mean ( 95% CI)   | Median (95% CI)  |
|-----------------------------|------------------|------------------|
| <b>Complete cohort</b>      |                  |                  |
| DFS (months)                | 63.5 (58.5–68.6) | 58.0 (43.7–72.3) |
| DSS (months)                | 74.3 (69.4–79.1) | NR               |
| <b>Early stage group</b>    |                  |                  |
| DFS (months)                | 71.5 (65.7–77.3) | 78.0 (NR)        |
| DSS (months)                | 83.7 (78.5–88.9) | NR               |
| <b>Advanced stage group</b> |                  |                  |
| DFS (months)                | 47.4 (39.5–55.4) | 40.0 (22.7–57.3) |
| DSS (months)                | 55.2 (47.3–63.2) | 49.0 (22.3–75.7) |

Abbreviations: SEM, Standard error of the mean; DSS, Disease-specific survival; DFS, Disease-free survival; NR, Not reach.

**Supplementary Table S3: Distribution of DFS and DSS times stratified by tumor stage and CHKA expression**

| Variable                    | CHKA low expression subgroup |                 | CHKA high expression subgroup |                  |
|-----------------------------|------------------------------|-----------------|-------------------------------|------------------|
|                             | Mean ( 95% CI)               | Median (95% CI) | Mean ( 95% CI)                | Median (95% CI)  |
| <b>Complete cohort</b>      |                              |                 |                               |                  |
| DFS (months)                | 76.7 (69.0–84.4)             | NR              | 56.0 (49.9–62.2)              | 46.0 (37.4–54.6) |
| DSS (months)                | 87.5 (80.7–94.3)             | NR              | 66.6 (60.5–72.6)              | 80.0 (NR)        |
| <b>Early stage group</b>    |                              |                 |                               |                  |
| DFS (months)                | 80.5 (72.3–88.8)             | NR              | 64.9 (57.3–72.4)              | 58.0 (34.4–81.6) |
| DSS (months)                | 91.5 (84.7–98.4)             | NR              | 77.6 (70.7–84.4)              | NR               |
| <b>Advanced stage group</b> |                              |                 |                               |                  |
| DFS (months)                | 61.3 (46.7–75.9)             | 54.0 (NR)       | 42.1 (33.2–51.1)              | 26.0 (11.1–40.9) |
| DSS (months)                | 70.1 (56.3–84.0)             | NR              | 49.6 (40.6–58.7)              | 31.0 (14.1–47.9) |

Abbreviations: SEM, Standard error of the mean; DSS, Disease-specific survival; DFS, Disease-free survival; NR, Not reach.

**Supplementary Table S4: Association between intratumoral CHKA mRNA expression and clinicopathologic characteristics in the 63-patient cohort**

| Characteristics                 | No. of patients (%) (n = 63) | CHKA mRNA expression |                   | P value <sup>a</sup> |
|---------------------------------|------------------------------|----------------------|-------------------|----------------------|
|                                 |                              | Low (%) (n = 31)     | High (%) (n = 32) |                      |
| <b>Gender</b>                   |                              |                      |                   | 0.527                |
| Female                          | 31 (49.2)                    | 14 (45.2)            | 17 (53.1)         |                      |
| Male                            | 32 (50.8)                    | 17 (54.8)            | 15 (46.9)         |                      |
| <b>Age (years)</b>              |                              |                      |                   | 0.674                |
| < 60                            | 24 (38.1)                    | 11 (35.5)            | 13 (40.6)         |                      |
| ≥ 60                            | 39 (61.9)                    | 20 (64.5)            | 19 (59.4)         |                      |
| <b>Tumor location</b>           |                              |                      |                   | 0.848                |
| Rectum                          | 44 (69.8)                    | 22 (71.0)            | 22 (68.7)         |                      |
| Colon                           | 19 (30.2)                    | 9 (29.0)             | 10 (31.3)         |                      |
| <b>Differentiation grade</b>    |                              |                      |                   | 0.269                |
| Well                            | 5 (7.9)                      | 4 (12.9)             | 1 (3.1)           |                      |
| Moderate                        | 47 (74.6)                    | 23 (74.2)            | 24 (75.0)         |                      |
| Poor                            | 11 (17.5)                    | 4 (12.9)             | 7 (21.9)          |                      |
| <b>Tumor size (cm)</b>          |                              |                      |                   | 0.663                |
| < 5                             | 41 (65.1)                    | 21 (67.7)            | 20 (62.5)         |                      |
| ≥ 5                             | 22 (34.9)                    | 10 (32.3)            | 12 (37.5)         |                      |
| <b>Local invasion</b>           |                              |                      |                   | 0.161                |
| pT <sub>1</sub> -T <sub>2</sub> | 20 (31.7)                    | 13 (41.9)            | 7 (21.9)          |                      |
| pT <sub>3</sub>                 | 33 (52.4)                    | 15 (48.4)            | 18 (56.2)         |                      |
| pT <sub>4</sub>                 | 10 (15.9)                    | 3 (9.7)              | 7 (21.9)          |                      |
| <b>Lymph node metastasis</b>    |                              |                      |                   | <b>0.015</b>         |
| Negative                        | 35 (55.6)                    | 22 (71.0)            | 13 (40.6)         |                      |
| Positive                        | 28 (44.4)                    | 9 (29.0)             | 19 (59.4)         |                      |
| <b>TNM stage</b>                |                              |                      |                   | <b>&lt; 0.001</b>    |
| I                               | 15 (23.8)                    | 14 (45.2)            | 1 (3.1)           |                      |
| II                              | 20 (31.7)                    | 8 (25.8)             | 12 (37.5)         |                      |
| III                             | 28 (44.5)                    | 9 (29.0)             | 19 (59.4)         |                      |
| <b>Adjuvant chemotherapy</b>    |                              |                      |                   | <b>0.002</b>         |
| No                              | 32 (50.8)                    | 22 (71.0)            | 10 (31.3)         |                      |
| Yes                             | 31 (49.2)                    | 9 (29.0)             | 22 (68.7)         |                      |
| <b>Recurrence</b>               |                              |                      |                   | 0.525                |
| No                              | 53 (84.1)                    | 27 (87.1)            | 26 (81.3)         |                      |
| Yes                             | 10 (15.9)                    | 4 (12.9)             | 6 (18.7)          |                      |
| <b>Death</b>                    |                              |                      |                   | 0.668                |
| No                              | 58 (92.1)                    | 29 (93.5)            | 29 (90.6)         |                      |
| Yes                             | 5 (7.9)                      | 2 (6.5)              | 3 (9.4)           |                      |

<sup>a</sup> Pearson chi-square test was used for comparison between subgroups. Bold type indicates statistical significance.
